# 1           **‘Reproductive response of laying chickens to ameliorative method of aflatoxin**

2   **\*\*Olayinka Abosede Ojo, \*<sup>1</sup>Immanuel Bitto and \*<sup>2</sup>Emmanuel Olubisi Ewuola**

3   \* <sup>1</sup>Department of Animal Breeding and Physiology, University of Agriculture, Makurdi, Nigeria

4   \* <sup>2</sup>Department of Animal Science, Animal Physiology Unit, University of Ibadan, Nigeria

5   **\*\*Department of Animal Production, Fisheries and Aquaculture, Kwara State University,**

6   **\*\* Corresponding author: [ykmelodya1@yahoo.com](mailto:ykmelodya1@yahoo.com) +2348064221539**

## 7   **Abstract**

8   Aflatoxin is toxic, carcinogenic and ubiquitous in nature, affecting both crops and livestock.  
9   Mitigating aflatoxin effect using toxin binders has not been very effective. Information on the use  
10   of biological methods in aflatoxin mitigation has not been adequately documented. Consequently,  
11   influence of bio-control method of aflatoxin on some reproductive hormones, ovarian weight and  
12   histopathological parameters of laying chickens (LC) were investigated. Point-of-lay Bovan Nera  
13   (n=700) were haphazardly distributed to four dietary treatments; Aflasafe maize-based diet  
14   (AMBD), farm feed (FF), aflatoxin-contaminated diet with toxin binder (ACDTB) and  
15   aflatoxin-contaminated diet without toxin binder (ACDWTB). The contaminated diets contained  
16   306.3ppb aflatoxin and the experimental design was completely randomized into four treatments  
17   (n= 175) of five replicates (n=35) per treatment for a period of 14 weeks. Blood (5mL) was  
18   collected at 14th week for LC to determine the estrogen, luteinising hormone (LH), follicle  
19   stimulating hormone (FSH), histopathology of the ovary using standard procedures. Data were  
20   analysed using descriptive statistics and ANOVA at  $\alpha=0.05$ . The ROW (%) ranged from  $0.34\pm 0.2$   
21   (ACDTB) to  $0.93\pm 0.3$  (AMBD). Estrogen (mg/dL) value was highest in LC fed ACDWTB  
22   ( $2.75\pm 1.08$ ) and least in FF ( $2.07\pm 0.52$ ). The LH (iu/L) value was highest in LC fed AMBD

23 (1.29±1.68) and least in ACDTB (0.36±0.32). Histopathology of the ovary showed cysts,  
24 observed along the oviduct wall in LC fed ACDTB. AMBD enhanced active laying period in LC  
25 with no sign of aflatoxocosis. The use of aflasafe maize grain in poultry diet is recommended.

26 Keywords: Aflatoxin-contaminated diet, Aflatoxicosis, ovary, hormones, histopathology and  
27 laying chickens

## 28 1. **Introduction**

29 Aflatoxin (AF) has been confirmed as most toxic, tetraoxygenic, mutagenic and carcinogenic  
30 mycotoxins so far known (Williams et al., 2009; Khan et al., 2010). The detrimental effect of  
31 aflatoxin on various animals has been well documented (Keyl and Booth, 1971; Lawloy and  
32 Lynch, 2001; Zain, 2010) and this include yellow ochre discoloration with multifocal  
33 haemorrhage with proliferation of the bile ducts (Ehklas, 2012). Hepatomegaly and hypertrophy  
34 in some organs and higher relative weights of the organs (Huff et al., 1992; Ologhobo et al., 2015)  
35 have been reported. Other effects include accelerated follicular atresia (Siloto et al., 2011),  
36 associated by discontinuance of egg laying during the feeding trial (Hafez et al., 1982). Aflatoxin  
37 has also been documented to cause disturbances in the hormonal profile of domestic animals,  
38 usually resulting in reduced fertility potential (Clarke et al., 1987; Tiemann and Vanselow, 2003;  
39 Hasanzadeh et al., 2011). Different approaches have been investigated to mitigate the effect of  
40 aflatoxin contamination in livestock feeds. This include use of enteroabsorbants such as hydrated  
41 sodium, calcium aluminosilicates. Although, it selectively bind aflatoxin B1 without depleting  
42 micronutrients (Williams et al., 2004), but, few successes have recorded with this method. A  
43 combination of heat with ammonia has also been stated to irreversibly detoxified aflatoxin  
44 (Brown, 2010), but the limitation is that it can only make the blue glow go away, without  
45 protecting the feed. Also, microorganisms resembling *Mycobacterium*, *Stenotrophomonas*  
46 *maltophilia* and *Trichoderma viride* have also been attested to succeed in breaking down aflatoxins  
47 (Liu et al., 2001 and Kasmani et al., 2012). However, they have been noted to pose health risks to

48 consumers. Physical and chemical methods of degradation have been known to cause reduced  
49 product nutrient, organoleptic qualities and undesirable health effects (Teniola et al., 2005).  
50 Consequent to these limitations, novel bio-control method with biological mechanism has been  
51 developed, which involves displacing toxigenic strains of *Aspergillus flavus* from agricultural  
52 fields with strains of *Aspergillus flavus* that do not produce aflatoxin (atoxigenic strains). This  
53 causes encumbrance with the contamination process by physically excluding the toxigenic strain  
54 as at the time of microorganism invasion and contending for nutrients needed for aflatoxin  
55 biosynthesis by the toxigenic strains, thereby abridging the total toxigenicity of *A. flavus*  
56 population. The significance of this research is to evaluate the changes in reproductive  
57 performance during chronic aflatoxicosis and compare it with the use of aflasafe maize-based diet  
58 (aflatoxin-free diet) in laying chickens.

59

## 60 MATERIALS AND METHODS

61 This study was carried out at God's Grace Farm, located in Lagun Town, along Ibadan- Iwo  
62 road, Oyo State. The Aflatoxin-contaminated maize grain and aflasafe maize grains used for this  
63 experiment were obtained from the plant pathology unit, International Institute of Tropical  
64 Agriculture, (IITA), Ibadan, Nigeria. Other ingredients used for the feed formulated were  
65 obtained from God's Grace feed Mill, the host farm. Maize grain, used as the aflatoxin carrier was  
66 inoculated with toxigenic strain of *Aspergillus flavus* of Nigerian origin. The culturing and  
67 inoculation was done at the plant pathology unit, International Institute of Tropical Agriculture  
68 (IITA), Ibadan, Nigeria, using 5% V8 juice and 2% agar, with PH 5.2 and a spore load of 2.475 x  
69 10<sup>6</sup> per ml. Aflatoxins, quantified using scanning densitometer, CAMAG TLC scanner 3 with –  
70 CATS 1,4,2 software (Camag AG, Muttenz, Switzerland) (Suhagia et al., 2006)

## 71 EXPERIMENTAL BIRDS AND MANAGEMENT

72 A total of 700, 30-week old Bovan Nera black hens with a mean body weight of 2.0kg was used  
73 for this experiment The experimental birds were randomly allotted into 4 treatments consisting of  
74 175 birds per treatment, replicated thrice with 35 birds/ replicate. The laying chickens were  
75 housed in battery cages having linear feed troughs and nipple drinkers for running water. The  
76 birds were fed basal feed for 14 days (acclimatization period), after which experimental diets and  
77 fresh water were provided *ad libitum*. Data collection was done weekly throughout the duration  
78 of the study which lasted for 14 weeks

## 79 2.2 EXPERIMENTAL DIETS

80 Four (4) experimental diets were formulated based on nutrient requirement of laying hens. The  
81 experimental diets are as shown in Table 1 comprising of the following; Treatment 1 (AMBD) –  
82 Aflasafe maize-based diet, Treatment 2 (FF+Toxin binder) –Farm feed with toxin binders  
83 (Control diet), Treatment 3 ((ACDTB)– Aflatoxin contaminated diet with toxin binder, Treatment  
84 4 (ACDWTB)– Aflatoxin- contaminated diet without toxin binder. The diets were subjected to  
85 chemical analysis, to obtain proximate composition as stated in Table 1 under the Analyzed  
86 nutrient segment. At the end of the experiment (14th week), 80 birds were randomly selected from  
87 each treatment and three (3) mls of blood sample was collected through the jugular vein in the  
88 earliest hours of the day, into anticoagulant-free bottles. These bottles were kept in slanting  
89 position and allowed to clot. The samples were spun at 3000 rpm for 10 minutes, serum samples  
90 obtained were then separated into sterile tubes for analysis. Enzyme Linked Immunosorbent  
91 Assay (ELIZA) kits were used for the assay of estrogen, follicle stimulating hormone and  
92 luteinizing hormone. Equipment used was ELIZA microplate reader/ absorbance (IRE 96), a fully  
93 automated 8-channels measurement system having absorbance as its detection mode (Bourne et  
94 al., 2003). After feeding trial, 80 birds (20 birds per replicate) were randomly selected per  
95 treatment, weighed and sacrificed. Dissection was done through the lower abdominal incision.  
96 Samples of the ovary and reproductive organ were harvested for histopathological investigation.

97 The tissues were cut into small pieces of not more than 4mm thick and placed into pre-labelled  
98 cassettes. These were further immersed in 10% formal saline for 24 hours to fix. Tissue  
99 processing was done using hematoxylin and eosin technique (Avwioro, 2010).

### 100 2.3 Statistical Analysis

101 All data obtained from the study was subjected to descriptive statistics and one-way analysis of  
102 variance (ANOVA) in a completely randomized design, using statistical analysis software (SAS,  
103 2008). Means were separated using Duncan multiple range test (Duncan, 1957).

104 **Table 1: Composition of the experimental diet (%) (Layers Mash)**

|                    | <b>AMBD</b> | <b>FF+Toxin<br/>binder</b> | <b>ACDTB</b> | <b>ACDWTB</b> |
|--------------------|-------------|----------------------------|--------------|---------------|
| Aflasafe Maize     | 50.220      | -                          | -            | -             |
| Farm Maize         | -           | 50.220                     | -            | -             |
| Contaminated Maize | -           | -                          | -            | -             |
| Soyabean Meal      | 23.100      | 23.100                     | 23.100       | 23.100        |
| Wheat offal        | 13.460      | 13.460                     | 13.460       | 13.460        |
| Salt               | 0.350       | 0.350                      | 0.350        | 0.350         |
| Bone Meal          | 3.010       | 3.010                      | 3.010        | 3.010         |
| Oyster Shell       | 9.040       | 9.040                      | 9.040        | 9.040         |
| Lysine             | 0.200       | 0.200                      | 0.200        | 0.200         |
| Methionine         | 0.200       | 0.200                      | 0.200        | 0.200         |
| Vitamin C          | 0.006       | 0.006                      | 0.006        | 0.006         |
| Layer Premix       | 0.300       | 0.300                      | 0.300        | 0.300         |
| Toxin Binder       | -           | 0.100                      | 0.100        | -             |
| Oxytetracycline    | 0.100       | 0.100                      | 0.100        | 0.100         |

|                             |         |         |         |         |
|-----------------------------|---------|---------|---------|---------|
| Total (kg)                  | 100.00  | 100.00  | 100.00  | 100.0   |
| <b>Calculated Nutrients</b> |         |         |         |         |
| Crude Protein (%)           | 17.30   | 17.30   | 17.30   | 17.30   |
| Crude Fibre (%)             | 4.56    | 4.56    | 4.56    | 4.56    |
| Metabolizable               | 2598.25 | 2598.25 | 2598.25 | 2598.25 |
| Energy(Kal/kg)              |         |         |         |         |
| Avail. Phosphorus           | 0.68    | 0.68    | 0.68    | 0.68    |
| Lysine                      | 1.05    | 1.05    | 1.05    | 1.05    |
| Methionine                  | 0.46    | 0.46    | 0.46    | 0.46    |
| Avail. Calcium              | 4.34    | 4.34    | 4.34    | 4.34    |

#### **Analysed Nutrients**

|                     |         |         |         |         |
|---------------------|---------|---------|---------|---------|
| Met energy(kcal/kg) | 2874.38 | 2926.22 | 3048.16 | 3052.60 |
| Crude protein       | 20.50   | 18.78   | 18.22   | 18.01   |
| Ash                 | 18.50   | 16.50   | 13.50   | 13.00   |
| Crude fibre         | 7.05    | 7.16    | 7.21    | 7.25    |
| Dry matter          | 90.49   | 90.09   | 90.40   | 90.29   |

---

105 *Vitamin A 10,000 IU, Vitamin D<sub>3</sub> 2,000 IU, vitamin E, 100 IU, Vitamin K, 20mg, thiamine B<sub>1</sub>, 15mg; Riboflavin B<sub>2</sub> 40mg, , Vitamin B<sub>6</sub> (pyridoxine)*  
 106 *1 5mg, Niacin 150 mg; Vitamin B<sub>12</sub> 0.015mg, Pantothenic acid 50mg, Folic acid 5mg, Biotin 0.2mg. Choline chloride, 12mg; , Antioxidants 1.25g;*  
 107 *Mn, 0.8g; Zinc, 0.5g; Iron, 0.2g; copper, 0.05g; iodine, 0.12g; Selenium, 2mg; cobalt, 2mg. AMBD= Aflasafe maize-based diet, FF =Farm feed*  
 108 *+ Toxin binder, ACDTB =Aflatoxin-contaminated diet with toxin binder and ACDWTB = Aflatoxin-contaminated diet without toxin binder.*

#### 109 **4. Results and discussion**

110 **Table 2: Weight of Reproductive Organ of laying chickens fed experimental diets**

| 111 | <b>PARAMETERS</b> | <b>AMBD</b>           | <b>FF+TOXIN</b>       | <b>ACDTB</b>          | <b>ACDWTB</b>         |
|-----|-------------------|-----------------------|-----------------------|-----------------------|-----------------------|
| 112 |                   | <b>BINDER</b>         |                       |                       |                       |
| 113 | Ovary (%)         | 0.93±0.3 <sup>a</sup> | 0.99±0.5 <sup>a</sup> | 0.34±0.2 <sup>b</sup> | 0.44±0.4 <sup>b</sup> |
| 114 | Repr. Organ (%)   | 2.47±0.4              | 2.44±0.7              | 1.48±1.2              | 2.25±1.9              |

115  
116 AMBD= Aflasafe maize-based diet, FF =Farm feed + Toxin binder, ACDTB =Aflatoxin-contaminated diet with toxin binder and ACDWTB =  
117 Aflatoxin-contaminated diet without toxin binder.

118  
119 The relative ovary weight of birds fed AMBD (0.93%) and FF+toxin binder (0.99%) were not  
120 different, however, both were significantly higher than the values observed in birds which  
121 received ACDTB (0.34%) and ACDWTB (0.44%) respectively. The result is in tandem with the  
122 observation of Ajani et al. (2014), who noticed ovary atresia i.e degeneration of immature ovarian  
123 follicles during follicular phase in laying hens fed a diet containing 8000ppb AFB for 7 days.  
124 According to Hafez et al. (1982), aflatoxicosis causes pathological changes in the chicken ovaries,  
125 which has detrimental effect on egg production. Therefore, it can be inferred that aflatoxin could  
126 have adverse effect on egg production, due to aflatoxin-related pathological changes in the ovary  
127 as reported in this study. The chickens fed ACDTB, showed ovarian cysts along the oviduct wall.  
128 This could also have been due to the aflatoxin-contamination effect. Cysts are fluid-filled cavities  
129 that may occur along the oviduct wall, resulting into tumor, when larger than 2mm in diameter. It  
130 has been noted that production of progesterone is usually by the largest growing follicles and its  
131 receptors are found along different points in the oviduct wall. The observed cysts could have  
132 blocked or reduced the number of progesterone receptors, causing a depression effect in the  
133 mechanism of progesterone production and its activity, with a negative influence on oviduct

134 contraction and egg transport. Perhaps, this have caused a drastic reduction in egg oviposition,  
135 resulting into re-absorption of yolk into the system of the hens. This result is in accordance with  
136 the reports of El-Azab et al. (2009) and Hasanzadeh et al. (2011), who stated that, aflatoxin has  
137 been shown to disrupt the reproductive system in both male and female animals, causing  
138 alterations in the form of growing and mature ovarian follicles.

#### 139 **4.1 Dietary effect on hormonal assay of laying chickens**

140 The results of the luteinizing hormone (LH), estrogen and follicle stimulating hormone  
141 (FSH) assays of laying chickens fed experimental diets during treatment period are illustrated in  
142 Table 3. Except the FSH values that was not significant, the luteinizing and estrogen hormone  
143 values showed significant differences. The LH value ( $1.29 \pm 1.68$  IU/L) obtained in birds fed the  
144 AMBD, was not significantly ( $P < 0.05$ ) different compared with those given FF+toxin binder  
145 ( $0.64 \pm 1.27$  IU/L), the LH values ( $0.36 \pm 0.32$  IU/L and  $0.42 \pm 1.03$  IU/L) of laying birds fed  
146 aflatoxin-contaminated diets with and without toxin binder were significantly lower. The mean  
147 value of estrogen recorded in birds fed AMBD ( $2.10 \pm 0.52$  pg/mL) showed no influence compared  
148 to the FF+toxin binder ( $2.07 \pm 0.83$  pg/mL). The mean values recorded for birds fed ACDTB  
149 ( $2.38 \pm 0.90$  pg/mL) and ACDWTB ( $2.75 \pm 1.08$  pg/mL) were not statistically influenced by the  
150 dietary treatment. The FSH values of laying chicken were not significantly ( $P < 0.05$ ) different  
151 among the treatments.

152 **Table 3: Hormonal Assay of laying hens fed experimental diets**

| PARAMETERS               | T1                | T2                   | T3                   | T4                |
|--------------------------|-------------------|----------------------|----------------------|-------------------|
| Luteinizing hormone (LH) | $1.29 \pm 1.68^a$ | $0.64 \pm 1.27^{ab}$ | $0.36 \pm 0.32^b$    | $0.42 \pm 1.03^b$ |
| Estrogen                 | $2.10 \pm 0.52^b$ | $2.07 \pm 0.83^b$    | $2.38 \pm 0.90^{ab}$ | $2.75 \pm 1.08^a$ |



|                      |           |           |           |           |
|----------------------|-----------|-----------|-----------|-----------|
| Follicle Stimulating | 2.66±1.33 | 2.24±0.84 | 2.13±0.68 | 2.22±0.79 |
| Hormone (FSH)        |           |           |           |           |

153 ab: means on the same rows but with different superscripts are significant (P<0.05). AMBD = Aflasafe maize-based diet, FF+Toxin binder = Farm  
154 feed + toxin binder, ACDTB= Aflatoxin-contaminated diet + toxin binder, ACDWTB= Aflatoxin-contaminated diet without toxin binder.

155         Reproductive hormones of birds fed experimental diet was significantly influenced by the  
156 dietary treatment. Luteinizing hormone is a primary hormone of reproduction, produced from the  
157 anterior lobe of the pituitary gland. The epithelial cells lining the empty follicular cavity has been  
158 reported to multiply under the influence of luteinizing hormone, to form corpus luteum. In poultry,  
159 ovulation and oviposition processes are controlled by luteinizing hormone and progesterone. A  
160 higher concentration of serum LH of experimental laying birds, as observed in birds fed AMBD, is  
161 an advantage as it would improve the egg laying capacity of the birds which would translate into  
162 higher profitability. The depressed values of LH in this study corroborate the findings of  
163 Hasanzadeh et al. (2011) and Ismail (2012), who reported a significantly lowered luteinizing  
164 hormone level in the aflatoxin-treated groups of male rats compared to the control, which received  
165 zero dosage of aflatoxin. This result might be attributed to the adverse effect of AF on the  
166 hypophysis, resulting into hypophysotoxicity, according to Clarke et al. (1987). Estrogen is a  
167 steroid hormone produced in the gonads, which performs a prominent role in the development of  
168 female secondary sex characteristics and in ovarian cycle. Trophic hormones FSH and LH are noted  
169 for stimulating the synthesis and release of estradiol from the theca interna of matured follicle. It  
170 has been documented that toxins cause a cascade of events called acute phase response, which  
171 induced local inflammation and activation of the hypothalamic-pituitary-adrenal axis (HPA), as  
172 stated by Sheng *et al.* (2021). Perhaps, the local inflammation of the HPA caused by AF effect had  
173 resulted into a significantly lowered concentration of LH and FSH in laying birds, which could have  
174 caused a concomitant decrease in the estrogen value. Documentation showed that FSH and LH  
175 release from the pituitary gland occurs in a rhythmic manner, as regulated by the hypothalamic  
176 biologic clock, known as pulse frequency (Squires, 2003). The frequency of GnRH (Gonadotropic

177 Releasing Hormone) by the hypothalamus, differentially affect FSH and LH release, which should  
 178 also influence estrogen synthesis and release. Contrary to this, the estrogen level of birds in  
 179 ACDWTB is significantly higher compared to the control (FF+Toxin binder). In literature, it has  
 180 been stated that cholesterol is the precursor of estradiol and it is present as low density lipoprotein  
 181 (LDL) in plasma. In the serum biochemical response of hens, the cholesterol level of the birds in  
 182 ACDWTB is highest. Perhaps, the high level of LDL (low density lipoprotein) in the plasma of the  
 183 laying hens acted as a precursor for increased synthesis of estrogen in the laying birds in ACDWTB,  
 184 with the recorded highest value. FSH functions in maintaining the hierarchy of size in the  
 185 developing follicles and the rate of follicular atresia. It also works synergistically with luteinizing  
 186 hormone to cause an elaborate secretion of estrogen during ovulation. An increased FSH  
 187 concentration in birds fed AMBD suggested a normal hierarchical follicular development and  
 188 ovulation, as well as normal egg production (Squires, 2003).

189 **Table 4: Histopathological examination of the ovary given aflatoxin-contaminated diet**

| Parameter | AMBD                 | FF+Toxin<br>binder   | ACDTB                                      | ACDWTB                                     |
|-----------|----------------------|----------------------|--------------------------------------------|--------------------------------------------|
| Ovary     | No visible<br>lesion | No visible<br>lesion | Cyst observed<br>along the<br>oviduct wall | Cyst observed<br>along the<br>oviduct wall |

190

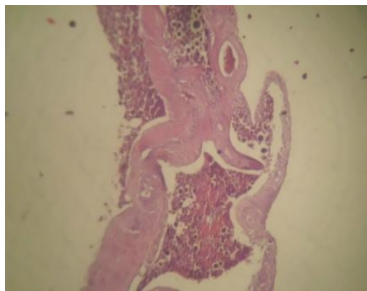

191

192

193

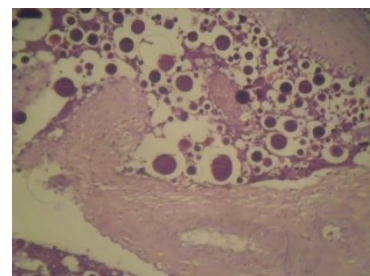

194

**Plate 1: Showing the Ovary of laying chickens fed AMBD. No visible lesion observed.**

**Plate 2: Showing the Ovary of laying chickens fed FF. No visible lesion was observed.**

195

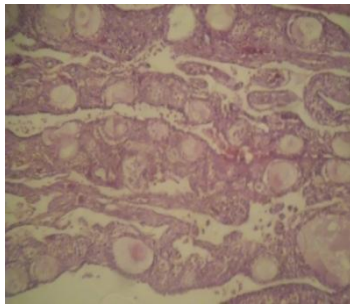

196

197

198

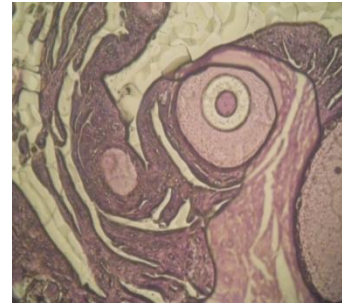

199 **Plate 3: Showing the Ovary of laying**  
**chickens fed AF-CDTB. No visible lesions**  
200 **seen. There are cysts along the oviduct wall.**

**Plate 4: Showing the ovary of laying chicken**  
**fed AF-CDTWB. There is no observable**  
**visible lesion.**

## 201 4.2 Ovary Histopathology

202 The microscopic investigation of various organs in previous studies showed that aflatoxin  
203 adversely affected the organs attributed with the hematopoietic, immune and the  
204 reticuloendothelial system (Qureshi et al., 1998; Ortatatli and Oguz, 2001; Ortatatli et al., 2005  
205 and Eklas, 2012). The ovary of laying chickens fed AMBD, which showed no histopathological  
206 alterations may be due to the aflatoxin-free diet obtained through the use of aflasafe maize.  
207 Similar result was observed in birds fed the FF+Toxin binder diet and birds fed ACDTWB.  
208 Although the ACDTWB diet had a recorded high aflatoxin concentration, which resulted into  
209 cessation of egg production in the group, corroborating the findings of Hafez et al. (2008) and  
210 Ismail (2012) who observed that aflatoxin-treated mature domestic fowls showed follicular  
211 atresia, accompanied by cessation of egg production during the whole feeding period. Hasanzadeh  
212 et al. (2014) also observed that the micromorphological effects of the AFB1 on the ovary showed  
213 that the attic changes were seen in different ovarian follicular layers, including oocyte, granulosa  
214 and theca, which increased both at the microscopic and macroscopic level (Siloto et al., 2011).  
215 Yet no visible lesion was observed and the concentration of the aflatoxin used showed no  
216 histopathological alteration on the ovary. Aflatoxin has also been shown to disrupt the

217 reproductive system in both male and female animals, causing alterations in the form of the  
218 growing and mature ovarian follicles. (El-Azab et al., 2009; Hasanzadeh et al., 2014).

## 219 **Conclusion and recommendation**

220 Adverse effects of aflatoxin in laying chickens can be prevented by the use of feed  
221 ingredients that contains no aflatoxin contamination through the mutual exclusion mechanism of  
222 *Aspergillus species* in the soil. Although aflatoxin binder is effective, but its cost implication  
223 could increase the overall production cost, especially on a large scale livestock farming.  
224 Aflatoxicosis in livestock can be mitigated with the use of aflasafe maize-based diets, it is  
225 therefore recommended for use in both small and large scale production.

## 226 **Ethics Statement**

227 This research was carried out in strict accordance with the recommendations in the Guide for the  
228 Care and Use of Laboratory Animals of the National Institutes of Health. The protocol was  
229 approved by the Committee on the Ethics of Animal Experiments of the Kwara State University .

## 230 **Consent for publication**

231 “Not applicable”

## 232 **Availability of data and materials**

233 The data sets used and/or analysed during the current study are available from the corresponding  
234 author on reasonable request.

## 235 **Competing interests**

236 The authors of this research paper do not have any financial or non financial competing interest.

## 237 **Authors' contributions**

238 **IB** made immense contributions to the design of the study and drafted the hormonal inclusion in  
239 this research; **EO** made the collaborative funding acquisition for this research possible and  
240 substantively revised it till perfection, **OA** collected, statistically analyzed and interpreted the data  
241 used in writing this manuscript and was a major contributor in writing this manuscript.

## 242 **Acknowledgements**

243 The authors of this manuscript gracefully acknowledged the expertise and advice that all the  
244 contributors have given to developing this study. These include; All Staff of the Pathological  
245 Unit, International Institute of Tropical Agriculture (IITA) and all staff and management of God's  
246 Grace Farm, Lagun, Oyo State, Nigeria.

## 247 **REFERENCES**

- 248 Ajani, Sudheer, D. V., Tanuja, P. and Pasha K. U. (2014). Aflatoxins. Indian Journal of Advances  
249 in chemical Science 3 (2014) 49-60. [www.ijacskros.com](http://www.ijacskros.com)
- 250 Avwioro O. G. (2010). Histochemistry and tissue pathology, principle and techniques,  
251 Claverianum press, Nigeria.
- 252 Brown D. Food chain Mycotoxins 2010: Threats and solutions.
- 253 Bourne, M., Franco, M., Wilkes, J. (2003), "Corporate performance measure-ment",  
254 Measuring Business Excellence, Vol. 7 No.3, pp. 15-21.
- 255 Clark JD, Jain AV, Mahaffey EA. Experimentally induced chronic aflatoxicosis in rabbits.  
256 *American Journal of Veterinary Research*, 1980 41: 1841-1845.
- 257 Clarke RN, Doerr JA, Ottinger, MA.. Age-Related Changes in Testicular Development and  
258 Reproductive Endocrinology Associated with Aflatoxicosis in the Male Chicken<sup>1</sup> *Biology*  
259 *of Reproduction*, 1987 Volume 36, Issue 1, 1 February 1987, Pages 117–124,  
260 <https://doi.org/10.1095/biolreprod.36.1.117>

- 261 Duncan, O. D. The Negro Population of Chicago: A Study of Res-idential Succession, Chicago:  
262 University of Chicago Press.1977, Introduction to Structural Equation Models, New Yor:  
263 Academic press.
- 264 Ekhlas KH. Histopathological changes of some internal organs in broilers fed aflatoxin.  
265 *Al-Qadisiya Journal of Vet. Med. Sci.* 2012 Vol./11.No./2 2012.
- 266 El-Azab SM. Study of aflatoxin B1 as a risk factor that impair the reproductive performance in  
267 females- Egypt. *The Internet Journal of Toxicology*, 2009 <http://264> Aflatoxins-Recent  
268 Advances and Future Prospects.  
269 [www.ispub.com:80/journal/the-internet-journal-of-toxicology/1](http://www.ispub.com:80/journal/the-internet-journal-of-toxicology/1).
- 270 Hafez AH, Megalla SE, Abdel-Fattah HM, Kamel YY.: Aflatoxin and aflatoxicosis II. Effects of  
271 aflatoxin on ovaries and testicles in mature domestic fowls. *Mycopathologia*, 1982  
272 77:137-139.
- 273 Hasanzadeh SH, Hosseini E. Rezazadeh L . Effects of aflatoxin B<sub>1</sub> On profiles of gonadotropic  
274 (FSH and LH), steroid (testosterone and 17 $\beta$ -estradiol) and prolactin hormones in adult  
275 male rat. *Iran Journal of Veterinary Research, Shiraz University*, 2011 vol. 12, No. 4, Ser.  
276 No. 37, 2011.
- 277 Huff W. E., Kubena L .F., Harvey R.B., Philips T.D. (1992). Efficacy of hydrated sodium calcium  
278 aluminosilicate to reduce the individual and combined toxicity of aflatoxin and ochratoxin  
279 A. *Poult Sci* 71: 64-69.
- 280 Ismail NH. Assesment of DNA damage in testes from young Wistar male rats treated with  
281 monosodium glutamate. *Life Science Journal* 2012 9, 930-939.

- 282 Kasmani FB, Krimi MAT, Allameh, A. Shariatmadari F. A novel aflatoxin-binding *Bacillus*  
283 probiotic: Performance, serum biochemistry and immunological parameters in Japanese  
284 quail. *Poultry Science*. 2012 91 (8): 1846-1853. Doi:10.3382/ps.2011-01830.
- 285 Keyl AC, Booth, AN. Aflatoxin effects in livestock. *J. Amer. Oil Chem. Soc.* 1971 48: 599-604.
- 286 Khan WA, Khan MZ, Khan A, Hussain I. Pathological effects of aflatoxin and their amelioration  
287 by vitamin E in White Leghorn layers. *Pak. Vet. J.* 2010 30 (3):155-162.
- 288 Lawloy PG, Lynch. Mycotoxins in pig feed 1: Source of toxins, prevention and management of  
289 mycotoxicosis. *Irish Vet. J.* 2001 54: 67-71.
- 290 Liu, J., C. Yang, S. Wasser, H. Shen, C. Tan and C. Ong, 2001. Protection of salvia miltiorrhiza  
291 against aflatoxin-B1-induced hepatocarcinogenesis in Fischer 344 rats dual mechanisms.  
292 *Life Sci.*, 69: 309-326.
- 293 [Direct Link](#) |
- 294 Ologhobo AD, Ewuola EO, Jerome UU, Franca UO., Ifarajimi Osaa. Growth, Nutrient  
295 Digestibility of Broilers fed Aflatoxin Contaminated Diets with Aflatoxin Binders. *ARP*  
296 *Journal of Science and Technology*. Vol. 5, No. 5, May 2015. ISSN 2225-7217.2
- 297 Ortatatli M, Oguz H. Ameliorative effects of dietary dipnoptilolite on pathological changes in  
298 broiler chickens during aflatoxicosis. *Res. Vet. Sci.* 2001 71: 59-66.
- 299 Ortatatli M, Oguz H, Hatipoglu F, Karaman M. Evaluation of pathological changes in broilers  
300 during chronic aflatoxin (50 and 100 ppb) and clinoptilolite exposure. *Research in*  
301 *Veterinary Science*, 2005 78, 61–68.

- 302 Siloto E V, Sartori D R S, Olivera E F A, Sartori J R, Fascina V B and Berto D A. 2011.  
303 Performance and Egg Quality of Laying Hens Fed Diets Containing Aflatoxin, Fumonisin  
304 and Adsorbent. *Brazilian Journal of Poultry Science* 13(1) 21-28.
- 305 Qureshi MA, Brake J, Hamilton PB, Hagler WM, Nesheim S. Dietary exposure of broiler  
306 breeders to aflatoxin results in immune dysfunction in progeny chicks. *Poult. Sci.* 1998  
307 77:812-819.
- 308 Sheng JA, Bales NJ, Myers SA, Bautista A.I, Roueinfar M, Hale T.M and Handa RJ.. The  
309 Hypothalamic-Pituitary-Adrenal Axis: Development, Programming Actions of Hormones,  
310 and Maternal-Fetal Interactions *Front. Behav. Neurosci.*, 13 January 2021  
311 <https://doi.org/10.3389/fnbeh.2020.601939>
- 312 Siloto EV, Sartori DRS., Olivera EFA, Sartori JR, Fascina VB, Berto DA. Performance and Egg  
313 Quality of Laying Hens Fed Diets Containing Aflatoxin, Fumonisin and Adsorbent.  
314 *Brazilian Journal of Poultry Science* 2011 13(1) 21-28.
- 315 Suhagia BN, Shah SA, Rathod IS, Patel HM, Shah, DR, Marolia, BP. Determination of  
316 gatifloxacin and ornidazole in tablet dosage forms by high-performance thin-layer  
317 chromatography. *Anal Sci.* 2006; 22 (5):743–745. doi: 10.2116/analsci.22.743.
- 318 Squires EJ. Applied Animal Endocrinology. CAB International, 2003 Cambridge, M.A 02139,  
319 USA.
- 320 Teniola, O. D., Addo, P. A., Brost, I. M., Farber, P., Jany, K. D., Alberts, J. F., et al. (2005).  
321 Degradation of aflatoxin B1 by cell-free extracts of *Rhodococcus erythropolis* and  
322 *Mycobacterium fluoranthenorans* sp. nov. DSM44556T. *Int. J. Food Microbiol.* 105,  
323 111–117. doi: 10.1016/j.ijfoodmicro.2005.05.004
- 324 [PubMed Abstract](#) | [CrossRef Full Text](#) | [Google Scholar](#)



- 325 Tiemann US, Vanselow J. Effect of the mycotoxin and beta zearalenol on regulation of  
326 progesterone synthesis in cultured granulosa cells from porcine ovaries. *Reproductive*  
327 *Toxicology*, 2003. 17, 6:673-681.
- 328 Williams JH, Philips TD, Jolly CM, Aggarwal D. Human aflatoxicosis in developing countries: a  
329 review of toxicology, exposure, potential health consequences and interventions.  
330 *American journal of Clinical Nutrition* 2004 80, 1106-1122.
- 331 Williams DE, Orner G, Williard KD, Tilton S, Hendricks JD. Rainbow trout (*Oncorhynchus*  
332 *mykiss*) and ultra-low dose cancer studies. *Comp.Biochem. Physiol. C*, 2009, 149:  
333 175-181. PMID : 19135172
- 334 Zain, ME.. Impact of mycotoxins on humans and animals. Original Article *Journal of Saudi*  
335 *Chemical Society* 2010 15, 129-144.
- 336
